# Supplementary material
Source: Springer Nature journal article supplement (https://www.springermedizin.de/resource/supplementary/13023_2013_692_MOESM11_ESM.pdf/9642682)

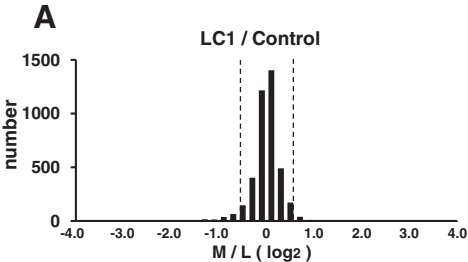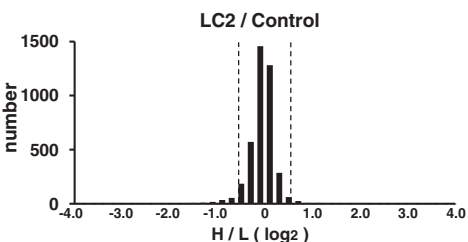

|      | LC1 (M/L) | LC2 (H/L) |
|------|-----------|-----------|
| mean | 1.02      | 0.98      |
| SD   | 0.213     | 0.287     |
| 2SD  | 0.427     | 0.574     |

**B**

| Symbol | ID          | Ratio    |          |
|--------|-------------|----------|----------|
|        |             | LC1(M/L) | LC2(H/L) |
| GAPDH  | IPI00219018 | 0.95     | 1.06     |
| ACTB   | IPI00021440 | 0.94     | 1.11     |
| PPIA   | IPI00419585 | 0.92     | 0.99     |
| RPLP1  | IPI00008527 | 1        | 1.02     |
| RPLP2  | IPI00008529 | 1.03     | 0.97     |
| RPS18  | IPI00013296 | 1.06     | 1.04     |

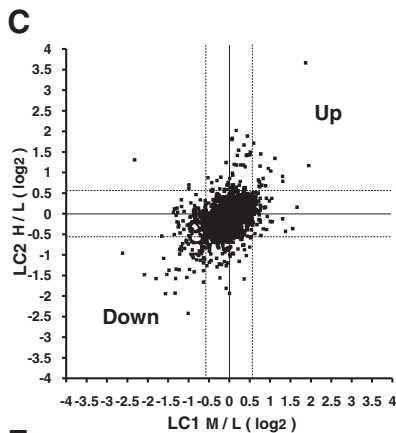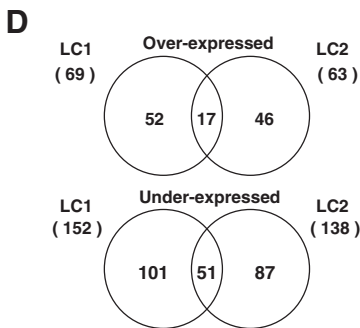

|              | Differentially expressed | Manual check-passed |
|--------------|--------------------------|---------------------|
| up (>1.5)    | 17                       | 17                  |
| down (<0.67) | 51                       | 36                  |
| total        | 68                       | 53                  |

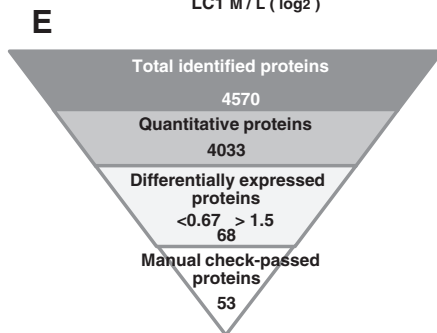

Supplement: MOESM11 [file 9642682]
